# Supplementary material for: Interlaboratory Comparison of SpermX™ and Conventional Differential Extractions Indicated High Male DNA Recovery by the SpermX Method
Source: MDPI journal article supplement (doi:10.3390/forensicsci3040043), 2023-12-01
Supplement: s1 [file s1]

## SUPPLEMENTAL TABLES

**TABLE S1.** Percentage Recovery, Standard Deviation and Relative Standard Deviation of Triplicates run with SpermX for LAB 1.

**S1.1.** Average Percentage Recovery for the triplicate epithelial fractions (E) and sperm fractions (S) for mixtures A-D.

| Mixture | Expected Target |           | Average Observed target |           | Average Percentage Recovered |       |
|---------|-----------------|-----------|-------------------------|-----------|------------------------------|-------|
|         | Female (ng)     | Male (ng) | Female (ng)             | Male (ng) | E                            | S     |
| A       | 1000            | 10        | 785.6                   | 7         | 78.56                        | 70.00 |
| B       | 2500            | 2.5       | 1816.3                  | 1.6       | 72.65                        | 64.00 |
| C       | 5000            | 5         | 3736.3                  | 3.6       | 74.73                        | 72.00 |
| D       | 7500            | 10        | 5152.7                  | 6.2       | 68.70                        | 62.00 |
| E       | 1500            | 2.5       | 1233.403                | 2.039     | 82.23                        | 81.56 |
| F       | 1500            | 1.25      | 1117.611                | 0.752     | 74.51                        | 60.16 |
| G       | 1500            | 0.33      | 1025.002                | 0.202     | 68.33                        | 61.21 |
| H       | 1500            | 0.0825    | 1318.198                | 0.054     | 87.88                        | 65.45 |

**S1.2.** Standard Deviation (SD) and Relative Standard Deviation (RSD) of the triplicate DNA recoveries for the epithelial fractions (E) and sperm fractions (S).

| Mixture | SD (E)  | RSD % (E) | SD (S) | RSD % (S) |
|---------|---------|-----------|--------|-----------|
| A       | 60.75   | 7.73      | 0.48   | 6.80      |
| B       | 311.17  | 17.13     | 0.19   | 11.87     |
| C       | 193.64  | 5.18      | 0.43   | 11.86     |
| D       | 1799.19 | 34.92     | 0.64   | 10.28     |
| E       | 220.59  | 17.88     | 0.31   | 15.36     |
| F       | 60.03   | 5.37      | 0.19   | 25.24     |
| G       | 85.60   | 8.35      | 0.09   | 42.87     |
| H       | 184.29  | 13.98     | 0.01   | 8.22      |

**TABLE S2.** Statistical significance for the total Y DNA recovery in the sperm fractions comparison of the SX and DE for each laboratory (alpha = 0.05). Data in Figures 1 and 2.

| <b>Mixture</b> | <b>Lab</b> | <b>Significance(Y/N)</b>   | <b>P stat<br/>(one tail)</b> |
|----------------|------------|----------------------------|------------------------------|
| <b>A</b>       | <b>2</b>   | <b>N (large variances)</b> | <b>0.106</b>                 |
|                | <b>3</b>   | <b>Y</b>                   | <b>0.011</b>                 |
| <b>B</b>       | <b>2</b>   | <b>Y</b>                   | <b>&lt;0.001</b>             |
|                | <b>3</b>   | <b>N</b>                   | <b>0.080</b>                 |
| <b>C</b>       | <b>2</b>   | <b>Y</b>                   | <b>0.001</b>                 |
|                | <b>3</b>   | <b>N</b>                   | <b>0.055</b>                 |
| <b>D</b>       | <b>2</b>   | <b>Y</b>                   | <b>0.035</b>                 |
|                | <b>3</b>   | <b>N</b>                   | <b>0.233</b>                 |
| <b>E</b>       | <b>1</b>   | <b>Y</b>                   | <b>&lt;0.001</b>             |
|                | <b>2</b>   | <b>Y</b>                   | <b>0.002</b>                 |
|                | <b>3</b>   | <b>Y</b>                   | <b>&lt;0.001</b>             |
| <b>F</b>       | <b>1</b>   | <b>Y</b>                   | <b>0.006</b>                 |
|                | <b>2</b>   | <b>Y</b>                   | <b>0.038</b>                 |
|                | <b>3</b>   | <b>Y</b>                   | <b>0.009</b>                 |
| <b>G</b>       | <b>1</b>   | <b>Y</b>                   | <b>0.018</b>                 |
|                | <b>2</b>   | <b>N</b>                   | <b>0.275</b>                 |
|                | <b>3</b>   | <b>N</b>                   | <b>0.082</b>                 |
| <b>H</b>       | <b>1</b>   | <b>N</b>                   | <b>0.087</b>                 |
|                | <b>2</b>   | <b>N</b>                   | <b>0.133</b>                 |
|                | <b>3</b>   | <b>Y</b>                   | <b>0.038</b>                 |

**TABLE S3.** Fold differences in total Y DNA (SX/DE) in the sperm fractions and lab averages. Data in Figures 1 and 2.

| <b>Mixture</b> | <b>Lab</b> | <b>Fold<br/>Difference</b> | <b>Average</b> |
|----------------|------------|----------------------------|----------------|
| <b>A</b>       | <b>1</b>   | N/A                        | <b>5.9</b>     |
|                | <b>2</b>   | <b>6.1</b>                 |                |
|                | <b>3</b>   | <b>5.8</b>                 |                |
| <b>B</b>       | <b>1</b>   | N/A                        | <b>2.5</b>     |
|                | <b>2</b>   | <b>2.7</b>                 |                |
|                | <b>3</b>   | <b>2.2</b>                 |                |
| <b>C</b>       | <b>1</b>   | N/A                        | <b>3.0</b>     |
|                | <b>2</b>   | <b>3.5</b>                 |                |
|                | <b>3</b>   | <b>2.5</b>                 |                |
| <b>D</b>       | <b>1</b>   | N/A                        | <b>1.5</b>     |
|                | <b>2</b>   | <b>1.6</b>                 |                |
|                | <b>3</b>   | <b>1.4</b>                 |                |
| <b>E</b>       | <b>1</b>   | <b>3.8</b>                 | <b>5.0</b>     |
|                | <b>2</b>   | <b>9.4</b>                 |                |
|                | <b>3</b>   | <b>1.8</b>                 |                |
| <b>F</b>       | <b>1</b>   | <b>2.9</b>                 | <b>2.8</b>     |
|                | <b>2</b>   | <b>3.8</b>                 |                |
|                | <b>3</b>   | <b>1.8</b>                 |                |
| <b>G</b>       | <b>1</b>   | <b>5.5</b>                 | <b>4.1</b>     |
|                | <b>2</b>   | <b>5.5</b>                 |                |
|                | <b>3</b>   | <b>1.3</b>                 |                |
| <b>H</b>       | <b>1</b>   | <b>7.2</b>                 | <b>12.6</b>    |
|                | <b>2</b>   | <b>23.0</b>                |                |
|                | <b>3</b>   | <b>7.7</b>                 |                |

**TABLE S4.** Fold difference in S/Y ratios (DE/SX) in the sperm fractions and lab averages. Data in Figure 3.

| <b>Mixture</b> | <b>Lab</b> | <b>Fold Difference</b> | <b>Average</b> |
|----------------|------------|------------------------|----------------|
| <b>A</b>       | <b>1</b>   | <b>N/A</b>             | <b>7.2</b>     |
|                | <b>2</b>   | <b>9.3</b>             |                |
|                | <b>3</b>   | <b>5.1</b>             |                |
| <b>B</b>       | <b>1</b>   | <b>N/A</b>             | <b>13.9</b>    |
|                | <b>2</b>   | <b>19.4</b>            |                |
|                | <b>3</b>   | <b>8.5</b>             |                |
| <b>C</b>       | <b>1</b>   | <b>N/A</b>             | <b>6.6</b>     |
|                | <b>2</b>   | <b>6.4</b>             |                |
|                | <b>3</b>   | <b>6.7</b>             |                |
| <b>D</b>       | <b>1</b>   | <b>N/A</b>             | <b>5.4</b>     |
|                | <b>2</b>   | <b>4.5</b>             |                |
|                | <b>3</b>   | <b>6.2</b>             |                |
| <b>E</b>       | <b>1</b>   | <b>4.2</b>             | <b>10.1</b>    |
|                | <b>2</b>   | <b>17.8</b>            |                |
|                | <b>3</b>   | <b>8.5</b>             |                |
| <b>F</b>       | <b>1</b>   | <b>4.8</b>             | <b>15.2</b>    |
|                | <b>2</b>   | <b>29.2</b>            |                |
|                | <b>3</b>   | <b>11.5</b>            |                |
| <b>G</b>       | <b>1</b>   | <b>4.8</b>             | <b>9.0</b>     |
|                | <b>2</b>   | <b>11.0</b>            |                |
|                | <b>3</b>   | <b>11.1</b>            |                |
| <b>H</b>       | <b>1</b>   | <b>5.6</b>             | <b>182.6</b>   |
|                | <b>2</b>   | <b>15.9</b>            |                |
|                | <b>3</b>   | <b>526.4</b>           |                |

**Table S5.** Statistical significance for the average percent female carryover in the sperm fractions comparison of the SX and DE for each laboratory (alpha = 0.05). Data in Figure 5.

| <b>Mixture</b> | <b>Lab</b> | <b>Significance<br/>(Y/N)</b> | <b>P stat<br/>(one tail)</b> |
|----------------|------------|-------------------------------|------------------------------|
| <b>A</b>       | <b>2</b>   | <b>Y</b>                      | <b>0.009</b>                 |
|                | <b>3</b>   | <b>N</b>                      | <b>0.106</b>                 |
| <b>B</b>       | <b>2</b>   | <b>Y</b>                      | <b>0.033</b>                 |
|                | <b>3</b>   | <b>Y</b>                      | <b>0.008</b>                 |
| <b>C</b>       | <b>2</b>   | <b>N</b>                      | <b>0.058</b>                 |
|                | <b>3</b>   | <b>N</b>                      | <b>0.098</b>                 |
| <b>D</b>       | <b>2</b>   | <b>Y</b>                      | <b>0.002</b>                 |
|                | <b>3</b>   | <b>Y</b>                      | <b>0.002</b>                 |
| <b>E</b>       | <b>1</b>   | <b>Y</b>                      | <b>0.049</b>                 |
|                | <b>2</b>   | <b>Y</b>                      | <b>0.025</b>                 |
|                | <b>3</b>   | <b>N</b>                      | <b>0.203</b>                 |
| <b>F</b>       | <b>1</b>   | <b>Y</b>                      | <b>0.048</b>                 |
|                | <b>2</b>   | <b>Y</b>                      | <b>0.004</b>                 |
|                | <b>3</b>   | <b>N</b>                      | <b>0.104</b>                 |
| <b>G</b>       | <b>1</b>   | <b>N</b>                      | <b>0.059</b>                 |
|                | <b>2</b>   | <b>N</b>                      | <b>0.067</b>                 |
|                | <b>3</b>   | <b>N</b>                      | <b>0.104</b>                 |
| <b>H</b>       | <b>1</b>   | <b>Y</b>                      | <b>0.003</b>                 |
|                | <b>2</b>   | <b>Y</b>                      | <b>&lt;0.001</b>             |
|                | <b>3</b>   | <b>N</b>                      | <b>0.104</b>                 |

**Table S6.** Fold Differences for higher DE Female Carryover (DE/SX) in the sperm fractions and lab averages. Data in Figure 5.

| Mixture | Lab | DE Fold Higher | Average |
|---------|-----|----------------|---------|
| A       | 1   | N/A            | 57.9*   |
|         | 2   | 2.9            |         |
|         | 3   | 112.9*         |         |
| B       | 1   | N/A            | 10.2    |
|         | 2   | 9.8            |         |
|         | 3   | 10.6           |         |
| C       | 1   | N/A            | 4.2     |
|         | 2   | 2.7            |         |
|         | 3   | 5.7            |         |
| D       | 1   | N/A            | 5.3     |
|         | 2   | 4.1            |         |
|         | 3   | 6.6            |         |
| E       | 1   | 1.5            | 3.3     |
|         | 2   | 1.9            |         |
|         | 3   | 6.5            |         |
| F       | 1   | 2.0            | 5.0     |
|         | 2   | 6.3            |         |
|         | 3   | 6.8            |         |
| G       | 1   | 1.6            | 3.5     |
|         | 2   | 1.8            |         |
|         | 3   | 7.0            |         |
| H       | 1   | 1.5            | 2.8     |
|         | 2   | 2.1            |         |
|         | 3   | 4.9            |         |

\*A mixture not included as Lab 3 had an outlier

**Table S7.** Percentage of unshared male alleles detected in the sperm fractions and fold differences (SX/DE).  
Data in Figure 6.

| <b>Mixture</b> | <b>Lab</b> | <b>SX-S</b>  | <b>DE-S</b>  | <b>Fold<br/>Difference</b> |
|----------------|------------|--------------|--------------|----------------------------|
| <b>A</b>       | <b>1</b>   | <b>100.0</b> | <b>N/A</b>   |                            |
|                | <b>2</b>   | <b>100.0</b> | <b>93.8</b>  | <b>1.1</b>                 |
|                | <b>3</b>   | <b>100.0</b> | <b>100.0</b> |                            |
| <b>B</b>       | <b>1</b>   | <b>100.0</b> | <b>N/A</b>   |                            |
|                | <b>2</b>   | <b>100.0</b> | <b>3.1</b>   | <b>32.0</b>                |
|                | <b>3</b>   | <b>100.0</b> | <b>100.0</b> |                            |
| <b>C</b>       | <b>1</b>   | <b>100.0</b> | <b>N/A</b>   |                            |
|                | <b>2</b>   | <b>96.9</b>  | <b>53.1</b>  | <b>1.8</b>                 |
|                | <b>3</b>   | <b>100.0</b> | <b>100.0</b> |                            |
| <b>D</b>       | <b>1</b>   | <b>100.0</b> | <b>N/A</b>   |                            |
|                | <b>2</b>   | <b>100.0</b> | <b>71.9</b>  | <b>1.4</b>                 |
|                | <b>3</b>   | <b>100.0</b> | <b>100.0</b> |                            |
| <b>E</b>       | <b>1</b>   | <b>100.0</b> | <b>100.0</b> |                            |
|                | <b>2</b>   | <b>100.0</b> | <b>25.0</b>  | <b>4.0</b>                 |
|                | <b>3</b>   | <b>100.0</b> | <b>75.0</b>  | <b>1.3</b>                 |
| <b>F</b>       | <b>1</b>   | <b>100.0</b> | <b>100.0</b> |                            |
|                | <b>2</b>   | <b>96.9</b>  | <b>15.6</b>  | <b>6.2</b>                 |
|                | <b>3</b>   | <b>100.0</b> | <b>81.3</b>  | <b>1.2</b>                 |
| <b>G</b>       | <b>1</b>   | <b>96.8</b>  | <b>54.8</b>  | <b>1.8</b>                 |
|                | <b>2</b>   | <b>43.8</b>  | <b>3.1</b>   | <b>14.0</b>                |
|                | <b>3</b>   | <b>93.8</b>  | <b>15.6</b>  | <b>6.0</b>                 |
| <b>H</b>       | <b>1</b>   | <b>58.1</b>  | <b>3.2</b>   | <b>18.0</b>                |
|                | <b>2</b>   | <b>100.0</b> | <b>0.0</b>   |                            |
|                | <b>3</b>   | <b>56.3</b>  | <b>15.6</b>  | <b>3.6</b>                 |

**Table S8.** Percentage of the male component in the STR profile from the sperm fractions using STRmix and fold differences (SX/DE). Data in Figure 10.

| <b>Mixture</b> | <b>Lab</b> | <b>SX-S</b> | <b>DE-S</b> | <b>Fold<br/>Difference</b> |
|----------------|------------|-------------|-------------|----------------------------|
| <b>A</b>       | <b>1</b>   | <b>83.0</b> | <b>N/A</b>  |                            |
|                | <b>2</b>   | <b>71.8</b> | <b>5.1</b>  | <b>14.0</b>                |
|                | <b>3</b>   | <b>86.1</b> | <b>38.6</b> | <b>2.2</b>                 |
| <b>B</b>       | <b>1</b>   | <b>34.4</b> | <b>N/A</b>  |                            |
|                | <b>2</b>   | <b>20.1</b> | <b>3.1</b>  | <b>6.4</b>                 |
|                | <b>3</b>   | <b>55.7</b> | <b>19.7</b> | <b>2.8</b>                 |
| <b>C</b>       | <b>1</b>   | <b>35.4</b> | <b>N/A</b>  |                            |
|                | <b>2</b>   | <b>7.0</b>  | <b>3.3</b>  | <b>2.2</b>                 |
|                | <b>3</b>   | <b>44.0</b> | <b>16.2</b> | <b>2.7</b>                 |
| <b>D</b>       | <b>1</b>   | <b>43.1</b> | <b>N/A</b>  |                            |
|                | <b>2</b>   | <b>13.2</b> | <b>2.8</b>  | <b>4.7</b>                 |
|                | <b>3</b>   | <b>44.9</b> | <b>8.2</b>  | <b>5.5</b>                 |
| <b>E</b>       | <b>1</b>   | <b>48.4</b> | <b>16.9</b> | <b>2.9</b>                 |
|                | <b>2</b>   | <b>27.9</b> | <b>0.9</b>  | <b>30.4</b>                |
|                | <b>3</b>   | <b>48.8</b> | <b>4.4</b>  | <b>11.0</b>                |
| <b>F</b>       | <b>1</b>   | <b>44.3</b> | <b>11.2</b> | <b>4.0</b>                 |
|                | <b>2</b>   | <b>14.0</b> | <b>1.8</b>  | <b>7.7</b>                 |
|                | <b>3</b>   | <b>33.9</b> | <b>4.2</b>  | <b>8.1</b>                 |
| <b>G</b>       | <b>1</b>   | <b>14.6</b> | <b>3.6</b>  | <b>4.0</b>                 |
|                | <b>2</b>   | <b>1.5</b>  | <b>0.5</b>  | <b>2.7</b>                 |
|                | <b>3</b>   | <b>9.7</b>  | <b>0.4</b>  | <b>23.7</b>                |
| <b>H</b>       | <b>1</b>   | <b>3.9</b>  | <b>1.4</b>  | <b>2.8</b>                 |
|                | <b>2</b>   | <b>12.7</b> | <b>0.3</b>  | <b>36.4</b>                |
|                | <b>3</b>   | <b>3.9</b>  | <b>0.7</b>  | <b>5.7</b>                 |



**Table S9.** Likelihood ratios using STRmix and fold differences (SX/DE). Data in Figure 11.

| Mixture | Lab | SX-S     | DE-S     | Fold Difference |
|---------|-----|----------|----------|-----------------|
| A       | 1   | 3.84E+27 | N/A      |                 |
|         | 2   | 9.38E+26 | 1.37E+23 | 6.85E+03        |
|         | 3   | 8.44E+26 | 8.48E+26 | 0.04            |
| B       | 1   | 2.19E+27 | N/A      |                 |
|         | 2   | 4.59E+26 | 9.60E+02 | 4.78E+23*       |
|         | 3   | 8.66E+26 | 3.24E+24 | 2.67E+02        |
| C       | 1   | 2.58E+27 | N/A      |                 |
|         | 2   | 6.68E+23 | 7.43E+13 | 8.98E+09        |
|         | 3   | 8.64E+26 | 2.01E+24 | 4.30E+02        |
| D       | 1   | 9.70E+26 | N/A      |                 |
|         | 2   | 1.14E+25 | 1.76E+15 | 6.44E+09        |
|         | 3   | 8.80E+26 | 1.42E+23 | 6.18E+03        |
| E       | 1   | 3.33E+27 | 2.74E+25 | 1.21E+02        |
|         | 2   | 5.16E+24 | 7.85E+03 | 6.58E+20        |
|         | 3   | 6.27E+25 | 1.60E+08 | 3.92E+17        |
| F       | 1   | 3.39E+27 | 3.43E+24 | 9.89E+02        |
|         | 2   | 4.20E+21 | 4.82E+05 | 8.72E+15        |
|         | 3   | 3.84E+26 | 1.02E+12 | 3.76E+14        |
| G       | 1   | 5.56E+23 | 1.36E+07 | 4.08E+16        |
|         | 2   | 5.52E+05 | 1.40E+01 | 3.95E+04        |
|         | 3   | 8.33E+12 | 8.31E-01 | 1.00E+13        |
| H       | 1   | 1.79E+08 | 4.23E+00 | 4.23E+07        |
|         | 2   | 6.00E+23 | 1.04E+00 | 5.80E+23        |
|         | 3   | 1.90E+01 | 2.94E+01 | 1.55            |

\*One outlier for Lab 2 mixture B gave a difference of  $10^{23}$

Highlighted shows Lab 3 had fairly comparable results for SX and DE for mixtures A and H.
